# Supplementary material for: Syntheses, structures and photoluminescent properties of a series of Ag(i) coordination architectures based on 2,4-diamino-6-methyl-1,3,5-triazine and dicarboxylates: from a 0D discrete molecule to a 3D infinite network
Source: Royal Society of Chemistry journal article supplement (doi:10.1039/c1ce05683b), 2011-01-01

## Electronic Supplementary Information (ESI) for CrystEngComm

### Syntheses, structures and photoluminescent properties of a series of Ag(I) coordination architectures based on 2,4-diamino-6-methyl-1,3,5-triazine and dicarboxylates: from 0D discrete molecule to 3D network

Di Sun,<sup>‡</sup> Yun-Hua Li,<sup>‡</sup> Hong-Jun Hao, Fu-Jing Liu, Yang Zhao, Rong-Bin Huang\*  
and Lan-Sun Zheng

*State Key Laboratory of Physical Chemistry of Solid Surface, Department of  
Chemistry, College of Chemistry and Chemical Engineering, Xiamen University,  
Xiamen, 361005, China*

*<sup>‡</sup>These authors contributed equally to this work.*

|                                                                                                                                             |   |
|---------------------------------------------------------------------------------------------------------------------------------------------|---|
| (1) Table S1 The hydrogen bond geometries for 1-5. ....                                                                                     | 2 |
| (2) Figure S1 Intramolecular face-to-face $\pi \cdots \pi$ interaction in 2.....                                                            | 3 |
| (3) Figure S2 Intrachain face-to-face $\pi \cdots \pi$ interaction and intrachain N-H $\cdots$ O <sub>glu</sub> hydrogen<br>bonds in 3..... | 4 |
| (4) Figure S3 The 3D supramolecular framework in 3.....                                                                                     | 5 |
| (5) Fig. S4 IR of complex 1-5.....                                                                                                          | 6 |
| (6) Fig. S5 The powder XRD patterns and the simulated one from the single-crystal<br>diffraction data for complex 1-5 .....                 | 9 |

**(1) Table S1** The hydrogen bond geometries for **1-5**.

| <b>Complex 1</b>                                                                                                        |      |       |           |         |
|-------------------------------------------------------------------------------------------------------------------------|------|-------|-----------|---------|
| D—H···A                                                                                                                 | D—H  | H···A | D···A     | D—H···A |
| N1—H1A···O1                                                                                                             | 0.88 | 1.97  | 2.830(5)  | 165     |
| N1—H1B···O2 <sup>iv</sup>                                                                                               | 0.88 | 2.02  | 2.898(5)  | 174     |
| N2—H2A···O1 <sup>i</sup>                                                                                                | 0.88 | 2.25  | 3.093(5)  | 160     |
| N2—H2B···O1W                                                                                                            | 0.88 | 1.97  | 2.806(5)  | 159     |
| O1W—H1WA···O2 <sup>v</sup>                                                                                              | 0.85 | 1.95  | 2.793(5)  | 174     |
| O1W—H1WB···N5 <sup>vi</sup>                                                                                             | 0.85 | 2.12  | 2.969(5)  | 174     |
| Symmetry code: (i) $-x+1/2, y, -z+1/2$ ; (iv) $x-1/2, -y+1, z-1/2$ ; (v) $x+1/2, -y+1, z-1/2$ ; (vi) $-x+1, -y+2, -z$ . |      |       |           |         |
| <b>Complex 2</b>                                                                                                        |      |       |           |         |
| N4—H4D···O1                                                                                                             | 0.88 | 2.26  | 3.134(12) | 173     |
| N4—H4E···N8 <sup>iii</sup>                                                                                              | 0.88 | 2.22  | 3.099(12) | 175     |
| N5—H5A···N7 <sup>iv</sup>                                                                                               | 0.88 | 2.06  | 2.935(12) | 176     |
| N5—H5B···O4 <sup>i</sup>                                                                                                | 0.88 | 2.10  | 2.906(12) | 153     |
| N9—H9A···O2                                                                                                             | 0.88 | 2.10  | 2.891(12) | 149     |
| N9—H9B···N3 <sup>iii</sup>                                                                                              | 0.88 | 2.01  | 2.881(12) | 171     |
| N10—H10C···O4 <sup>i</sup>                                                                                              | 0.88 | 2.64  | 3.249(14) | 127     |
| N10—H10D···N2 <sup>iv</sup>                                                                                             | 0.88 | 2.26  | 3.138(12) | 174     |
| O1W—H1WA···O2 <sup>v</sup>                                                                                              | 0.85 | 2.11  | 2.957(13) | 174     |
| O1W—H1WB···O3                                                                                                           | 0.85 | 2.31  | 3.123(12) | 161     |
| Symmetry code: (i) $-x+1, -y+1, -z+1$ ; (iii) $-x, -y+1, -z$ ; (iv) $-x, -y, -z$ ; (v) $-x, -y+1, -z+1$ .               |      |       |           |         |
| <b>Complex 3</b>                                                                                                        |      |       |           |         |
| N4—H4D···O3 <sup>i</sup>                                                                                                | 0.88 | 2.05  | 2.927(6)  | 173     |
| N4—H4E···N7 <sup>iii</sup>                                                                                              | 0.88 | 2.20  | 3.080(6)  | 177     |
| N5—H5A···N8 <sup>iv</sup>                                                                                               | 0.88 | 2.19  | 3.062(6)  | 173     |
| N5—H5B···O2                                                                                                             | 0.88 | 2.10  | 2.968(6)  | 169     |
| N9—H9A···N3 <sup>iv</sup>                                                                                               | 0.88 | 2.17  | 3.046(6)  | 173     |
| N9—H9B···O4                                                                                                             | 0.88 | 2.08  | 2.948(6)  | 169     |
| N10—H10A···N2 <sup>iii</sup>                                                                                            | 0.88 | 2.20  | 3.075(6)  | 178     |
| N10—H10B···O1 <sup>i</sup>                                                                                              | 0.88 | 2.03  | 2.907(5)  | 174     |
| Symmetry codes: (i) $-x+2, -y+1, -z+1$ ; (iii) $-x+2, -y, -z+2$ ; (iv) $-x+1, -y+1, -z+2$ .                             |      |       |           |         |
| <b>Complex 4</b>                                                                                                        |      |       |           |         |
| N3—H3A···O2                                                                                                             | 0.88 | 2.03  | 2.910(4)  | 176     |
| N3—H3B···N7 <sup>iii</sup>                                                                                              | 0.88 | 2.07  | 2.949(4)  | 176     |
| N6—H6A···O1 <sup>i</sup>                                                                                                | 0.88 | 2.02  | 2.890(4)  | 172     |
| N6—H6B···N2 <sup>iv</sup>                                                                                               | 0.88 | 2.28  | 3.047(4)  | 146     |
| Symmetry codes: (i) $-x+2, y, -z+3/2$ ; (iii) $x-1/2, y+1/2, z$ ; (iv) $x+1/2, y-1/2, z$ .                              |      |       |           |         |
| <b>Complex 5</b>                                                                                                        |      |       |           |         |
| N3—H3D···N2 <sup>ii</sup>                                                                                               | 0.88 | 2.24  | 3.101(6)  | 164.8   |
| N3—H3E···O2 <sup>i</sup>                                                                                                | 0.88 | 2.12  | 2.888(6)  | 145.8   |
| N5—H5B···O2                                                                                                             | 0.88 | 2.15  | 2.969(6)  | 155.1   |
| N5—H5A···O1 <sup>iii</sup>                                                                                              | 0.88 | 2.01  | 2.838(6)  | 157.0   |
| Symmetry codes: (i) $-x+2, -y+1, -z+1$ ; (ii) $-x+3, -y+1, -z+2$ ; (iii) $x, -y+3/2, z-1/2$ .                           |      |       |           |         |

(2) **Figure S1** Intramolecular face-to-face  $\pi \cdots \pi$  interaction in **2**

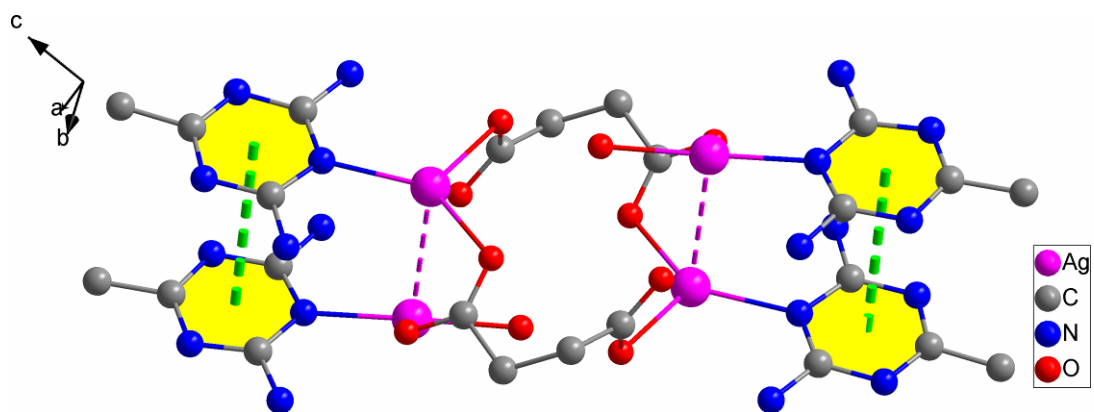

(3) **Figure S2** Intrachain face-to-face  $\pi\cdots\pi$  interaction and intrachain N-H $\cdots$ O<sub>glu</sub> hydrogen bonds in **3**

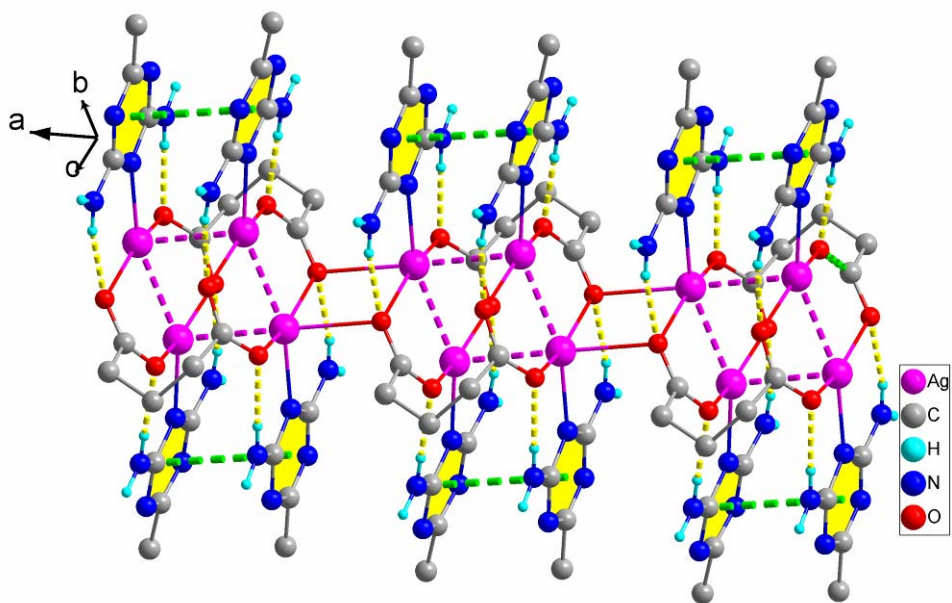

**(4) Figure S3** The 3D supramolecular framework in **3**

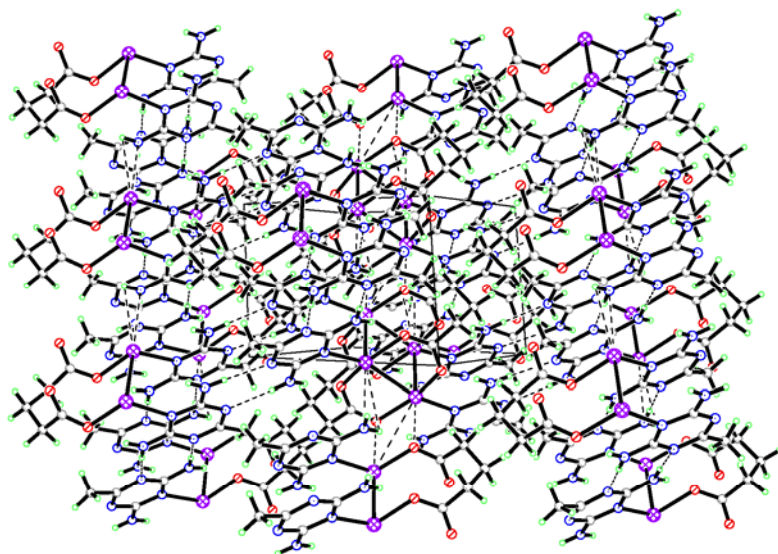

(5) Fig. S4 IR of complex 1-5

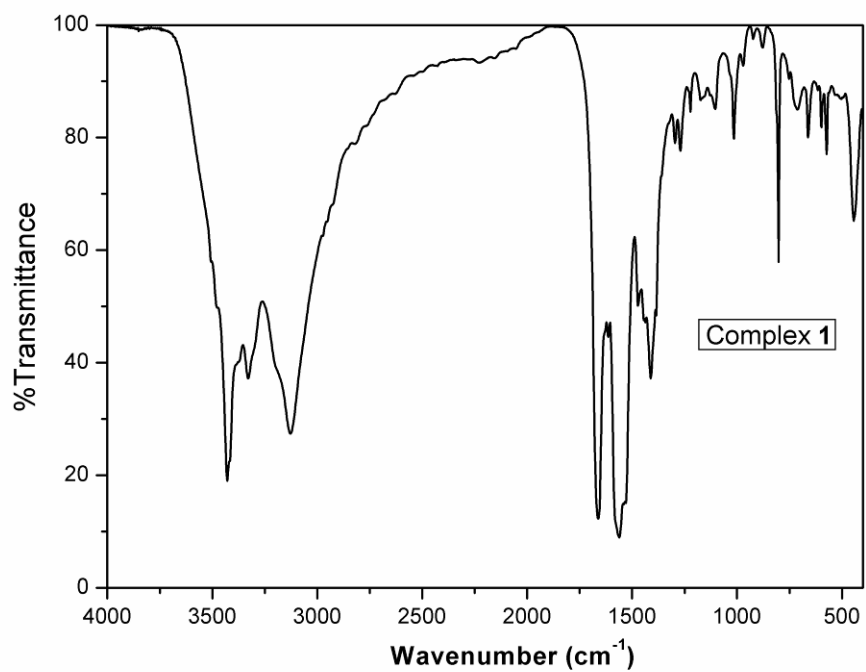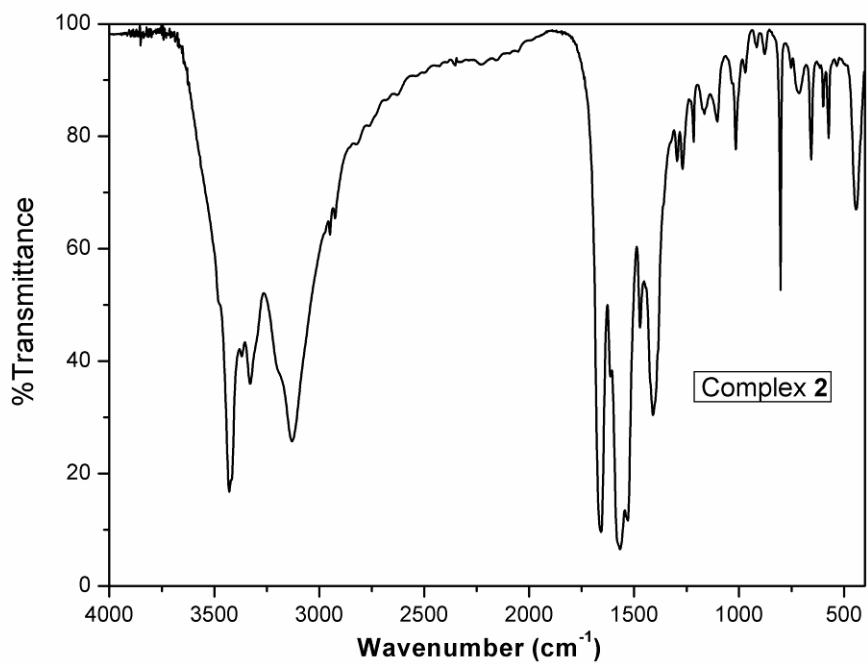

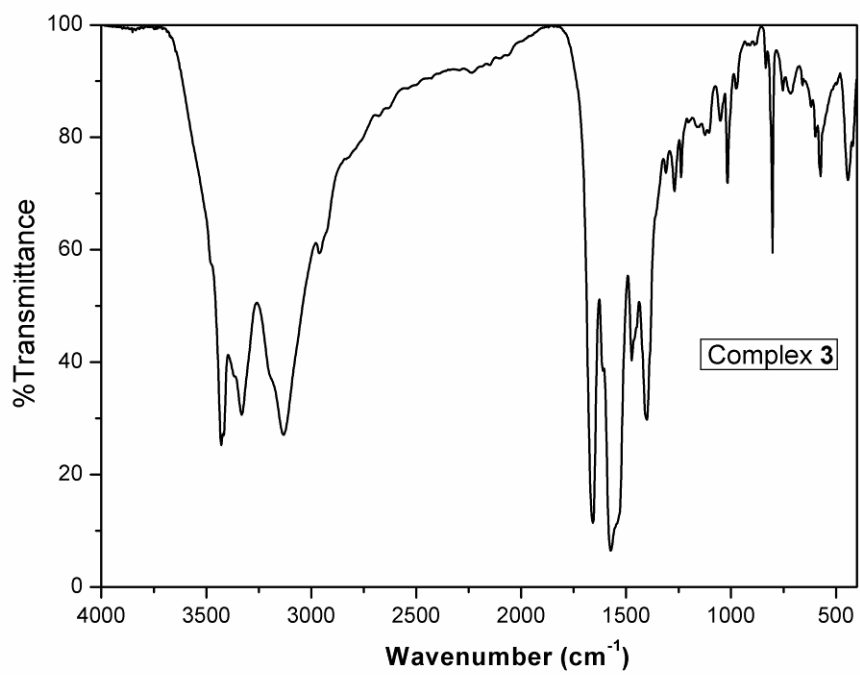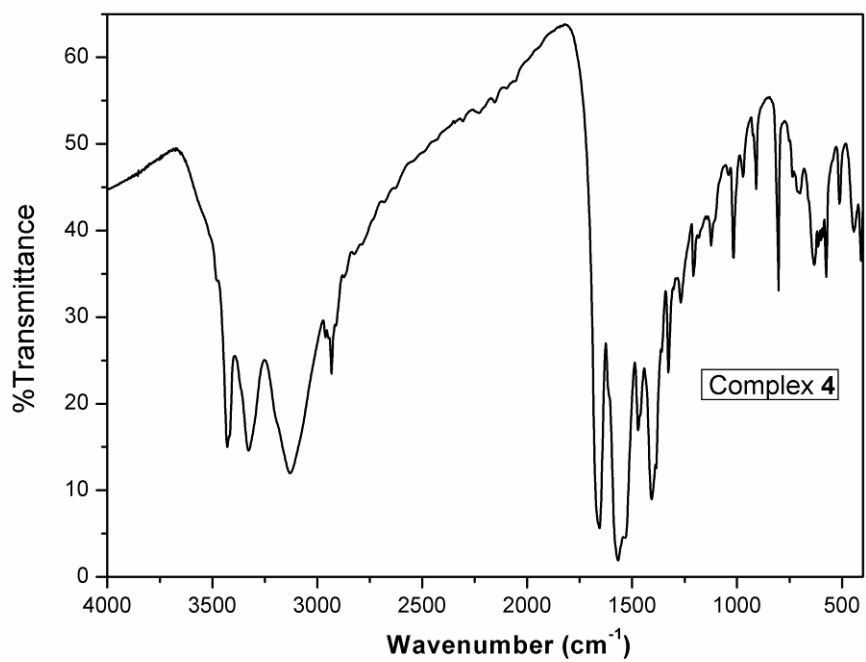

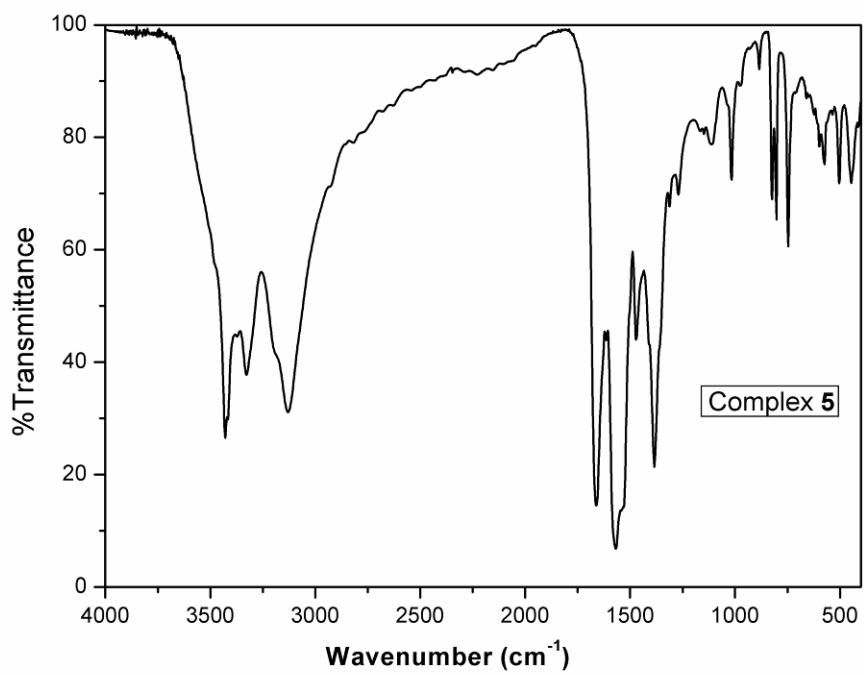



(6) Fig. S5 The powder XRD patterns and the simulated one from the single-crystal diffraction data for complex 1-5

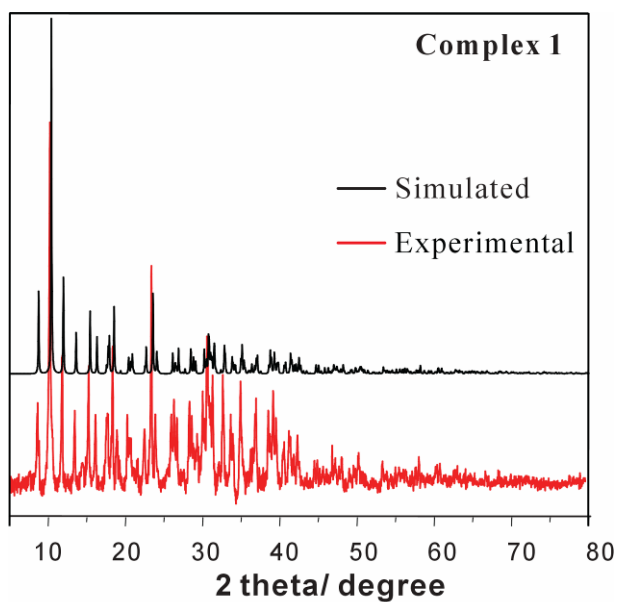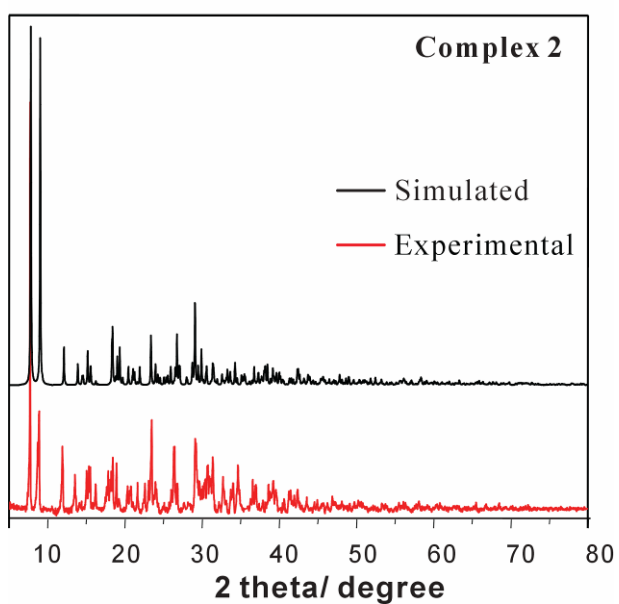

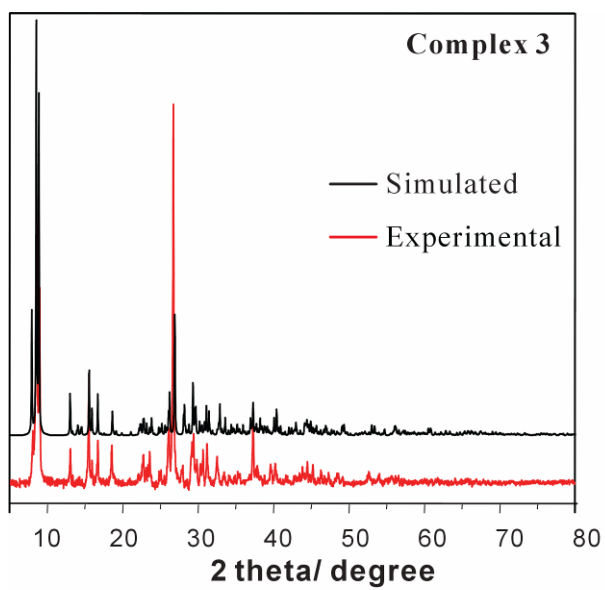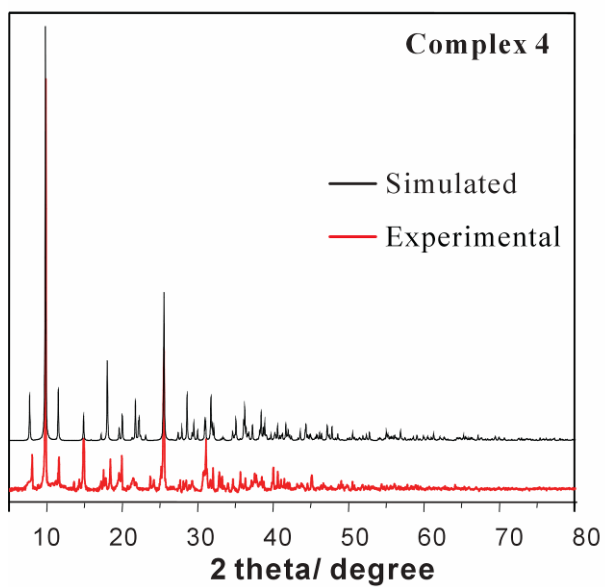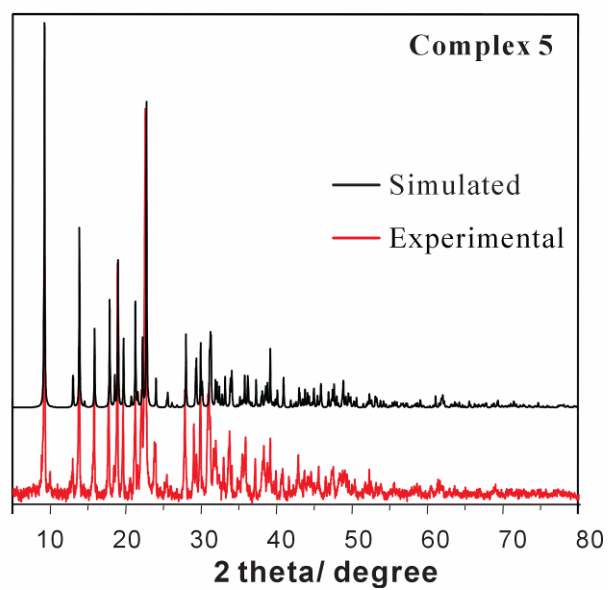

(7) Fig. S6 The photoluminescence spectrum of 2,4-diamino-6-methyl-1,3,5-triazine (dmt).

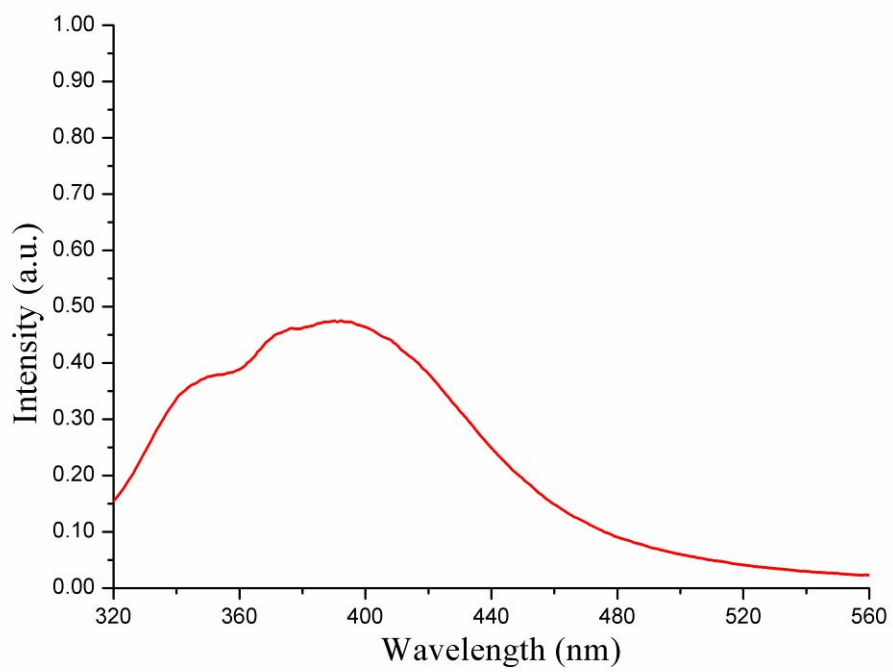

Supplement: c1ce05683b.pdf [file c1ce05683b.pdf]
